# Supplementary material for: Regulation of Microtubule Nucleation in Mouse Bone Marrow-Derived Mast Cells by Protein Tyrosine Phosphatase SHP-1
Source: MDPI journal article supplement (doi:10.3390/cells8040345), 2019-04-11
Supplement: s1 [file s1]

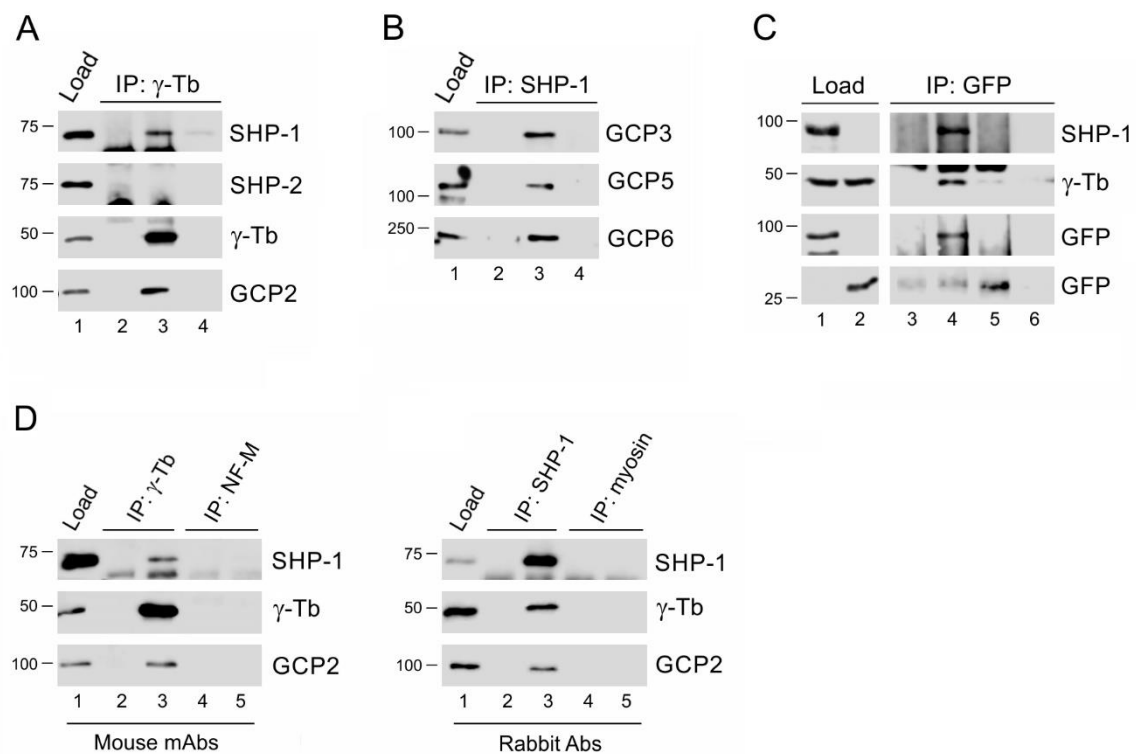

**Figure S2.** Association of SHP-1 with  $\gamma$ -tubulin complex proteins, and isotype controls for immunoprecipitation experiments. Immunoprecipitation from BMMCs (**A-B, D**) or HEK (**C**) extracts. (**A**) Precipitation with immobilized Ab to  $\gamma$ -tubulin sequence 38-53. Blots probed with Abs to SHP-1, SHP-2,  $\gamma$ -tubulin ( $\gamma$ -Tb) and GCP2. Load (*lane 1*), immobilized Ab not incubated with cell extract (*lane 2*), precipitated proteins (*lane 3*), and carrier without Ab, incubated with cell extracts (*lane 4*). (**B**) Precipitation with immobilized Ab to SHP-1. Blots probed with Abs to GCP3, GCP5 and GCP6. Load (*lane 1*), immobilized Ab not incubated with cell extract (*lane 2*), precipitated proteins (*lane 3*), and carrier without Ab, incubated with cell extracts (*lane 4*). (**C**) Precipitation with immobilized Ab to GFP. Blots probed with Abs to SHP-1,  $\gamma$ -tubulin ( $\gamma$ -Tb) and GFP. Load, HEK cells expressing SHP-1\_EGFP (*lane 1*), Load, cells expressing EGFP (*lane 2*), immobilized Ab not incubated with cell extract (*lane 3*), precipitated proteins from cells expressing SHP-1\_EGFP (*lane 4*), cells expressing EGFP (*lane 5*), and carrier without Ab, incubated with cell SHP-1\_EGFP cell extract (*lane 6*). (**D**) Isotype controls for immunoprecipitation experiments. Extracts were precipitated with immobilized mouse mAb to  $\gamma$ -tubulin (IgG2b), mouse mAb to NF-M (IgG2a), rabbit Ab to SHP-1, or rabbit Ab to myosin. Blots were probed with Abs to SHP-1,  $\gamma$ -tubulin ( $\gamma$ -Tb) and GCP2. Load (*lane 1*), immobilized Abs not incubated with cell extracts (*lanes 2 and 4*), precipitated proteins (*lanes 3 and 5*).
