# Supplementary material for: Regulation of Microtubule Nucleation in Mouse Bone Marrow-Derived Mast Cells by Protein Tyrosine Phosphatase SHP-1
Source: MDPI journal article supplement (doi:10.3390/cells8040345), 2019-04-11
Supplement: s1 [file s1]

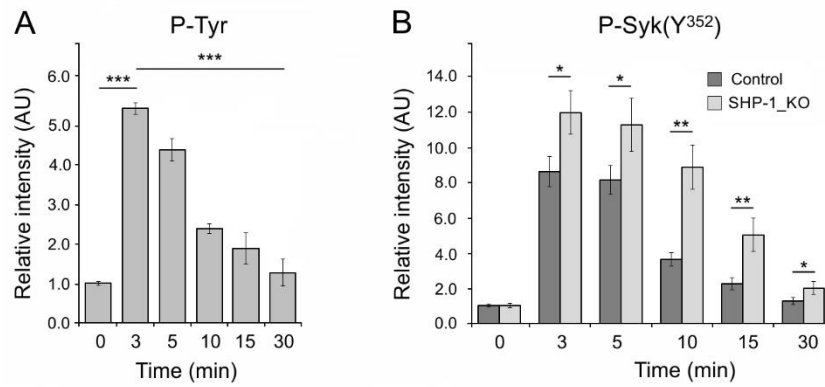

**Figure S1.** Quantitative analysis of overall tyrosine phosphorylation and tyrosine phosphorylation of Syk in the course of BMMCs activation. **(A)** Densitometric quantification of overall protein tyrosine phosphorylation level shown in Figure 1A. Relative intensities of P-Tyr normalized to non-activated cells and the amount of actin in individual samples. **(B)** Densitometric quantification of Syk kinase Y<sup>352</sup> phosphorylation level shown in Figure 5A. Relative intensities of P-Syk(Y<sup>352</sup>) in control BMMCs and SHP-1\_KO cells normalized to non-activated cells and the amount of actin in individual samples. (A-B) Values indicate mean  $\pm$  SD ( $n=3$ ), \* $p < 0.05$ , \*\* $p < 0.01$ , \*\*\* $p < 0.001$ .
