# Supplementary material for: Regulation of Microtubule Nucleation in Mouse Bone Marrow-Derived Mast Cells by Protein Tyrosine Phosphatase SHP-1
Source: MDPI journal article supplement (doi:10.3390/cells8040345), 2019-04-11
Supplement: s1 [file s1]

**Table S1**      **Sequences of primers used for RT-qPCR analysis of mouse genes**

| Name                | Sequence                      | Amplicon length |
|---------------------|-------------------------------|-----------------|
| <i>Ptpn6</i> , fwd  | 5'- GAACATTCTTCCCTTTGACC-3'   | 127 bp          |
| <i>Ptpn6</i> , rev  | 5'- TCTTAGAGTTCTCATCTGGAC-3'  |                 |
| <i>Ptpn11</i> , rev | 5'- AACATCACTGGTGTGGAGGC-3'   | 287 bp          |
| <i>Ptpn11</i> , rev | 5' – TGCACAGTTCAGCGGGTA-3'    |                 |
| <i>Il13</i> , fwd   | 5'- CTTAAGGAGCTTATTGAGGAG-3'  | 144 bp          |
| <i>Il13</i> , rev   | 5'- CATTGCAATTGGAGATGTTG-3'   |                 |
| <i>Tnf</i> , fwd    | 5'- CTATGTCTCAGCCTCTTCTC-3'   | 108 bp          |
| <i>Tnf</i> , rev    | 5'- CATTTGGGAAC TTCTCATCC-3'  |                 |
| <i>Ptgs2</i> , fwd  | 5'- ACTCATAGGAGAGACTATCAAG-3' | 147 bp          |
| <i>Ptgs2</i> , rev  | 5'- GAGTGTGTTGAATTCAGAGG-3'   |                 |
| <i>Gapdh</i> , fwd  | 5'- AACTTTGGCATTGTGGAAGG-3'   | 68 bp           |
| <i>Gapdh</i> , rev  | 5'- ATCCACAGTCTTCTGGGTGG-3'   |                 |
